# Supplementary material for: Identification of Autophagy-Related Genes in the Potato Psyllid, Bactericera cockerelli and Their Expression Profile in Response to ‘Candidatus Liberibacter Solanacearum’ in the Gut
Source: MDPI journal article supplement (doi:10.3390/insects12121073), 2021-11-30
Supplement: s1 [file s1]

**Table S1.** Primers for bioinformatics validation and gene expression analyses by qPCR of autophagy-related genes.

| Gene Code      | Validation Primers (5'-3')                          | qPCR primers (5'-3')                                 |
|----------------|-----------------------------------------------------|------------------------------------------------------|
| <i>BcATG1</i>  | F: AACTCTCCCCTCACCTCAT<br>R: GTCTACATGGCGGAGGTGTT   | F: CGACCCACAACAACAAC<br>R: ATTTAGCCAGCGTTTCACAG      |
| <i>BcATG2</i>  | F: TAAAACACCACCGGAGGAAG<br>R: GCTCACGCTAGGAATCGAAC  | F: CAAGGACAGTGAAGGAGCAG<br>R: TACCTGGACACGGAGAACAC   |
| <i>BcATG3</i>  | F: AGTTTGTGGCAGCAGGAGAT<br>R: AAAGCGGTTTAGAACCGAAA  | F: CTCAAGACGCTGCAAACAAA<br>R: GTGTCAACCCAACCCTCATC   |
| <i>BcATG4</i>  | F: TTAGCCCTTTGGTATTGTGA<br>R: GCGAAGAGGCTGTAAGTATC  | F: TCCAAGACATCAACCCTGTG<br>R: GCTTTCCCCTATCACTCCT    |
| <i>BcATG5</i>  | F: CACCGAGAGATCACACGAAA<br>R: GGTGTTGGAGTTGCCTTCAT  | F: ATGTGACCGACCATCAGCTT<br>R: TCCACAGCTTCTCTGCTAGGAC |
| <i>BcATG6</i>  | F: CACTACCCCACTCAATAACA<br>R: CATCTGGAAGAGGAAAGCAT  | F: ATTCACCATCTCCTCTCCA<br>R: TGACTCTCTGCTTCTACACTGA  |
| <i>BcATG7</i>  | F: CGGTTCTTTCACCAGCTCTC<br>R: GAGACTGACGAGCAGGGTTC  | F: ATGACGGGGACACAAAGTTC<br>R: GATCCATAGACTCCCGCAAG   |
| <i>BcATG8</i>  | F: ATCAACGTTAAGAGCTCAAG<br>R: CAGGGTCCAGGGTAGAAAGA  | F: GTTGAAAAAGCCCCAAAG<br>R: GCGGATGAGGAAATAGAACTG    |
| <i>BcATG9</i>  | F: TCCTCAGGAAGGAGGAGTGA<br>R: AGGAGGACTTGGGAGCTAGG  | F: GACAAGCACACATCCAGAG<br>R: GAGTTACAAGTGGCGAGCATAA  |
| <i>BcATG10</i> | F: CTACATGAAACCCCATAGA<br>R: TCTCTGCCTCTTAACCCATA   | F: CACCCCTATCTGAGGAAACC<br>R: CTTGACCCTTGTTGGTAACG   |
| <i>BcATG12</i> | F: GTACCGATTGACTTGCATTC<br>R: ATCCACTTCCTCCATGATTG  | F: TTTGCACCTTCTCCTGACAC<br>R: CCATGCTTGTGTTTTGCAGT   |
| <i>BcATG13</i> | F: TATTGTGCGTCCCATGTGTT<br>R: GATGGTCAGGTCCGTTCTGT  | F: GGATGGCTTCAACAAGGTTC<br>R: GATGGTCAGGTCCGTTCTGT   |
| <i>BcATG14</i> | F: AACAGCTTCGAGCTAAGCAAA<br>R: GCTCTCCTCCTCCTCATCCT | F: TAAATTCAGCAAGCGTGTGG<br>R: ATGCAAAGGCAGGTCAGTGT   |

|                  |                                                      |                                                      |
|------------------|------------------------------------------------------|------------------------------------------------------|
| <i>BcATG16</i>   | F: TGGATGTGTAGAGGCAGGAA<br>R: AGCAAGACTGCTGGAGAAGG   | F: GCTGTGATAGAACCCCAAG<br>R: CGTCGTATGTCACCAGATCG    |
| <i>BcATG17</i>   | F:<br>R:                                             | F: CAGAAGGCACTGATACGGAAG<br>R: AATGTTTCGTCCTCACGGTCT |
| <i>BcATG18-2</i> | F: TTTCAAGTGCTGCTGTAGAT<br>R: AGGCGAGATGTTTGTGCTT    | F: GCATAGGTTGGATGGTCGTAA<br>R: TCGGAAGTTTTGAGAGAGCA  |
| <i>BcATG18-3</i> | F: CACAAGTCTGAAAGTGGAAGC<br>R: GGGAATGCGAGGAGAGAGT   | F: CTAGGCCATGTGGAATGCT<br>R: TGTTGGGGTACTTTGGGTGT    |
| <i>BcATG18-4</i> | F: ACCTTTGCCTTCTAAATGAG<br>R: TGTCTCTTCTCAATCTTACAGC | F: CAAGCAACATGAGCAAAGGA<br>R: GCCATTATCCATGCAACAAG   |
| <i>BcATG101</i>  | F: GGTCACCAAATCGACGAAGT<br>R: TAGTTGATGGGGTCGTAGGC   | F: CTCAAGCCTCTTTCACACGA<br>R: AGGGTGCCAACGGAGTATTT   |

**Table S2.** Comparison of autophagy-related genes in *D. melanogaster*, *A. pisum*, *B. tabaci*, *D. citri*, and *B. cockerelli*.

| <i>D. melanogaster</i><br>(conserved domains,<br>protein length in AA) | <i>A. pisum</i> (protein<br>length in AA)                               | <i>B. tabaci</i> (protein length in AA)                                                                                                                            | <i>D. citri</i> (protein<br>length in AA)                                | <i>B. cockerelli</i> (most similar protein,<br>E-value, protein length in AA) |
|------------------------------------------------------------------------|-------------------------------------------------------------------------|--------------------------------------------------------------------------------------------------------------------------------------------------------------------|--------------------------------------------------------------------------|-------------------------------------------------------------------------------|
| Autophagy-related 1<br>(Atg1) (855 AA)                                 | LOC100159542<br>serine/threonine-<br>protein kinase unc-<br>51 (663 AA) | LOC109038743 serine/threonine-<br>protein kinase ULK2 (664 AA)                                                                                                     | LOC103514260<br>serine/threonine<br>-protein kinase<br>ULK1 (567 AA)     | serine/threonine-protein kinase ULK2-<br>like isoform 1 (2.72112E-39, 226 AA) |
| Autophagy-related 2<br>(Atg2) (1906 AA)                                | LOC100169298<br>autophagy-related<br>protein 2 homolog<br>B (1983 AA)   | LOC109044529 autophagy-<br>related protein 2 homolog B<br>isoform X1 (1993 AA) /<br>LOC109044529 autophagy-<br>related protein 2 homolog B<br>isoform X2 (1964 AA) | LOC103519534<br>autophagy-<br>related protein 2<br>homolog B (340<br>AA) | autophagy-related protein 2 homolog<br>A (1.2937E-110, 1025 AA)               |

|                                          |                                                                           |                                                                     |                                                                               |                                                                       |
|------------------------------------------|---------------------------------------------------------------------------|---------------------------------------------------------------------|-------------------------------------------------------------------------------|-----------------------------------------------------------------------|
|                                          |                                                                           |                                                                     | LOC113465363<br>autophagy-<br>related protein 2<br>homolog A-like<br>(361 AA) |                                                                       |
|                                          |                                                                           |                                                                     | LOC103509283<br>autophagy-<br>related protein 2<br>homolog A-like<br>(137 AA) |                                                                       |
|                                          |                                                                           |                                                                     | LOC113471576<br>autophagy-<br>related protein 2<br>homolog B-like<br>(95 AA)  |                                                                       |
| Autophagy-related 3<br>(Atg3) (330 AA)   | LOC100168321<br>autophagy related<br>protein Aut1-like<br>(339 AA)        | LOC109031323 ubiquitin-like-<br>conjugating enzyme ATG3 (316<br>AA) | LOC103517262<br>ubiquitin-like-<br>conjugating<br>enzyme ATG3<br>(140 AA)     | autophagy related protein Atg3-like<br>protein (4.03526E-132, 326 AA) |
|                                          | LOC100159720<br>ubiquitin-like-<br>conjugating<br>enzyme ATG3 (335<br>AA) |                                                                     | LOC113470558<br>ubiquitin-like-<br>conjugating<br>enzyme ATG3<br>(119 AA)     |                                                                       |
|                                          |                                                                           |                                                                     | LOC103517272<br>ubiquitin-like-<br>conjugating<br>enzyme ATG3<br>(89 AA)      |                                                                       |
| Autophagy-related 4a<br>(Atg4a) (410 AA) |                                                                           | LOC109042782 cysteine protease<br>ATG4A (396 AA)                    | LOC103520402<br>cysteine<br>protease<br>ATG4A-like (170<br>AA)                |                                                                       |
|                                          |                                                                           |                                                                     | LOC103520210<br>cysteine<br>protease                                          |                                                                       |

|                                       |                                                                                |                                                                                                            |                                                                                      |                                                                       |
|---------------------------------------|--------------------------------------------------------------------------------|------------------------------------------------------------------------------------------------------------|--------------------------------------------------------------------------------------|-----------------------------------------------------------------------|
|                                       |                                                                                |                                                                                                            | ATG4A-like (117 AA)                                                                  |                                                                       |
| Autophagy-related 4b (Atg4b) (668 AA) | LOC100160112 cysteine protease ATG4B (402 AA)                                  |                                                                                                            | LOC103520393 cysteine protease ATG4B-like (124 AA)                                   | cysteine protease ATG4B-like isoform 1 (3.00685E-158, 395 AA)         |
|                                       | LOC100571688 cysteine protease ATG4B (252 AA)                                  |                                                                                                            |                                                                                      |                                                                       |
| Autophagy-related 5 (Atg5) (269 AA)   | Autophagy-specific gene 5 (266 AA)                                             | LOC109038543 autophagy protein 5 isoform X1 (289 AA)/ LOC109038543 autophagy protein 5 isoform X2 (252 AA) | LOC103512211 autophagy protein 5 (270 AA)                                            | Autophagy protein 5 (1.11789E-124, 267 A)                             |
| Autophagy-related 6 (Atg6) (422 AA)   | LOC100162879 beclin-1-like protein (420 AA)                                    | LOC109036018 beclin-1-like protein (429 AA)                                                                | LOC103511670 beclin-1-like protein (497 AA)                                          | Beclin-1-like protein (1.26527E-75, 519 AA)                           |
| Autophagy-related 7 (Atg7) (510 AA)   | LOC100168214 ubiquitin-like modifier-activating enzyme ATG7 (680 AA)           | LOC109037754 ubiquitin-like modifier-activating enzyme ATG7 (654 AA)                                       | LOC103514245 ubiquitin-like modifier-activating enzyme ATG7 (626 AA)                 | Ubiquitin-like modifier-activating enzyme ATG7 (1.55145E-145, 536 AA) |
| Autophagy-related 8a (Atg8a) (121 AA) | LOC100163628 gamma-aminobutyric acid receptor-associated protein-like (118 AA) | LOC109035081 gamma-aminobutyric acid receptor-associated protein (120 AA)                                  | LOC103508318 gamma-aminobutyric acid receptor-associated protein isoform X3 (120 AA) | gamma-aminobutyric acid receptor-associated protein (3E-114, 119 AA)  |
| Autophagy-related 8b (Atg8b) (120 AA) |                                                                                |                                                                                                            | LOC103521693 gamma-aminobutyric acid receptor-associated protein-like (109 AA)       |                                                                       |

|                                          |                                                                                                                                                                                                                                                                 |                                                                                                                                                                |                                                                            |                                                                                       |
|------------------------------------------|-----------------------------------------------------------------------------------------------------------------------------------------------------------------------------------------------------------------------------------------------------------------|----------------------------------------------------------------------------------------------------------------------------------------------------------------|----------------------------------------------------------------------------|---------------------------------------------------------------------------------------|
| Autophagy-related 9<br>(Atg9) (845 AA)   | LOC100159271<br>autophagy-related<br>protein 9A (712 AA)                                                                                                                                                                                                        | LOC109034026 autophagy-<br>related protein 9A (730 AA)                                                                                                         | LOC103522855<br>autophagy-<br>related protein<br>9A (606 AA)               | Autophagy-related protein 9A<br>(6.45637E-174, 717 AA)                                |
|                                          | LOC100167077<br>autophagy-related<br>protein 9A (615 AA)                                                                                                                                                                                                        |                                                                                                                                                                |                                                                            |                                                                                       |
| Autophagy-related 10<br>(Atg10) (172 AA) | LOC100575896<br>ubiquitin-like-<br>conjugating<br>enzyme ATG10<br>(165 AA)                                                                                                                                                                                      | LOC109040219 ubiquitin-like-<br>conjugating enzyme ATG10 (203<br>AA)                                                                                           | LOC103523617<br>ubiquitin-like-<br>conjugating<br>enzyme ATG10<br>(206 AA) | ubiquitin-like-conjugating enzyme<br>ATG10 (4E-53, 222 AA)                            |
| Autophagy-related 12<br>(Atg12) (111 AA) | LOC100159402<br>ubiquitin-like<br>protein ATG12 (107<br>AA)                                                                                                                                                                                                     | LOC109033666 autophagy<br>protein 12-like (118 AA)                                                                                                             |                                                                            | autophagy protein 12-like (5E-38,<br>113 AA)                                          |
| Autophagy-related 13<br>(Atg13) (523 AA) | LOC100573619<br>autophagy-related<br>protein 13 homolog<br>isoform X3 (472<br>AA) /<br>LOC100573619<br>autophagy-related<br>protein 13 homolog<br>isoform X1 (517<br>AA) /<br>LOC100573619<br>autophagy-related<br>protein 13 homolog<br>isoform X2 (514<br>AA) | LOC109038021 autophagy-<br>related protein 13 homolog<br>isoform X1 (420 AA) /<br>LOC109038021 autophagy-<br>related protein 13 homolog<br>isoform X2 (417 AA) | LOC103506104<br>autophagy-<br>related protein<br>13-like (219 AA)          | autophagy-related protein 13<br>homolog (3.03445E-79, 298 AA)                         |
|                                          |                                                                                                                                                                                                                                                                 |                                                                                                                                                                | LOC103515171<br>autophagy-<br>related protein<br>13 homolog<br>(292 AA)    |                                                                                       |
| Autophagy-related 14<br>(Atg14) (503 AA) | LOC100164156<br>beclin 1-associated<br>autophagy-related                                                                                                                                                                                                        | LOC109042483 beclin 1-<br>associated autophagy-related key<br>regulator isoform X1 (477 AA) /                                                                  |                                                                            | beclin 1-associated autophagy-<br>related key regulator-like (1.86016E-<br>81, 416AA) |

|                                         |                                                                                                                                               |                                                                                                                                               |                                                                                                                                             |                                                                               |
|-----------------------------------------|-----------------------------------------------------------------------------------------------------------------------------------------------|-----------------------------------------------------------------------------------------------------------------------------------------------|---------------------------------------------------------------------------------------------------------------------------------------------|-------------------------------------------------------------------------------|
|                                         | key regulator isoform X2 (483 AA) / LOC100164156 beclin 1-associated autophagy-related key regulator isoform X1 (487 AA)                      | LOC109042483 beclin 1-associated autophagy-related key regulator isoform X2 (476 AA)                                                          |                                                                                                                                             |                                                                               |
| Autophagy-related 16 (Atg16) (612 AA)   | LOC100167285 autophagy-related protein 16-1 (541 AA)                                                                                          | LOC109034579 autophagy-related protein 16-1 (549 AA)                                                                                          | LOC103513712 autophagy-related protein 16-1-like isoform X2 (344 AA) / LOC103513712 autophagy-related protein 16-1-like isoform X1 (425 AA) | Autophagy-related protein 16-1-like (0.0, 550 AA)                             |
| Autophagy-related 17 (Atg17) (1357 AA)  | LOC100573296 RB1-inducible coiled-coil protein 1 isoform X1 (1039 AA) / LOC100573296 RB1-inducible coiled-coil protein 1 isoform X2 (1037 AA) | LOC109034605 RB1-inducible coiled-coil protein 1 isoform X2 (1113 AA) / LOC109034605 RB1-inducible coiled-coil protein 1 isoform X1 (1114 AA) | LOC103507010 RB1-inducible coiled-coil protein 1-like (441 AA)                                                                              | RB1-inducible coiled-coil protein 1-like (0.0, 1033 AA) *                     |
|                                         |                                                                                                                                               |                                                                                                                                               | LOC103520418 RB1-inducible coiled-coil protein 1-like (462 AA)                                                                              |                                                                               |
| Autophagy-related 18a (Atg18a) (377 AA) | LOC100164804 WD repeat domain phosphoinositide-interacting protein 3 (346 AA)                                                                 | LOC109031531 WD repeat domain phosphoinositide-interacting protein 3 (348 AA)                                                                 | LOC103512994 WD repeat domain phosphoinositide-interacting                                                                                  | WD repeat domain phosphoinositide-interacting protein 3 (6.74028E-87, 177 AA) |

|                                            |                                                                                                                                                                                                                                                                                                                                                                                                                                                    |                                                                                                                                                                                                         |                                                                                                  |                                                                                            |
|--------------------------------------------|----------------------------------------------------------------------------------------------------------------------------------------------------------------------------------------------------------------------------------------------------------------------------------------------------------------------------------------------------------------------------------------------------------------------------------------------------|---------------------------------------------------------------------------------------------------------------------------------------------------------------------------------------------------------|--------------------------------------------------------------------------------------------------|--------------------------------------------------------------------------------------------|
|                                            |                                                                                                                                                                                                                                                                                                                                                                                                                                                    |                                                                                                                                                                                                         | protein 2-like<br>(285 AA)                                                                       |                                                                                            |
|                                            |                                                                                                                                                                                                                                                                                                                                                                                                                                                    | LOC109032757 WD repeat<br>domain phosphoinositide-<br>interacting protein 4-like (350 AA)                                                                                                               | LOC103521300<br>WD repeat<br>domain<br>phosphoinositid<br>e-interacting<br>protein 3 (349<br>AA) | WD repeat domain phosphoinositide-<br>interacting protein 4-like (8.45801E-<br>39, 106 AA) |
| Autophagy-related 18b<br>(Atg18b) (471 AA) | LOC100165258<br>WD repeat domain<br>phosphoinositide-<br>interacting protein 2<br>isoform X3 (463<br>AA) /<br>LOC100165258<br>WD repeat domain<br>phosphoinositide-<br>interacting protein 2<br>isoform X5 (422<br>AA) /<br>LOC100165258<br>WD repeat domain<br>phosphoinositide-<br>interacting protein 2<br>isoform X4 (445<br>AA) /<br>LOC100165258<br>WD repeat domain<br>phosphoinositide-<br>interacting protein 2<br>isoform X2 (464<br>AA) | LOC109043586 WD repeat<br>domain phosphoinositide-<br>interacting protein 2 isoform X2<br>(425 AA) / LOC109043586 WD<br>repeat domain phosphoinositide-<br>interacting protein 2 isoform X1<br>(446 AA) |                                                                                                  | WD repeat domain phosphoinositide-<br>interacting protein 2-like (0, 465 AA)               |
| Autophagy-related 101<br>(Atg101) (218 AA) | LOC100164875<br>autophagy-related<br>protein 101 isoform<br>X3 (219 AA)                                                                                                                                                                                                                                                                                                                                                                            | LOC109034734 autophagy-<br>related protein 101 isoform X2<br>(218 AA) / LOC109034734<br>autophagy-related protein 101<br>isoform X1 (232 AA)                                                            | LOC103509748<br>autophagy-<br>related protein<br>101 (244 AA)                                    | autophagy-related protein 101-like<br>isoform 1 (5.64157E-82, 244 AA)                      |

|  |  |  |                                                               |  |
|--|--|--|---------------------------------------------------------------|--|
|  |  |  | LOC103509752<br>autophagy-<br>related protein<br>101 (211 AA) |  |
|--|--|--|---------------------------------------------------------------|--|

\* Not verified by sequencing

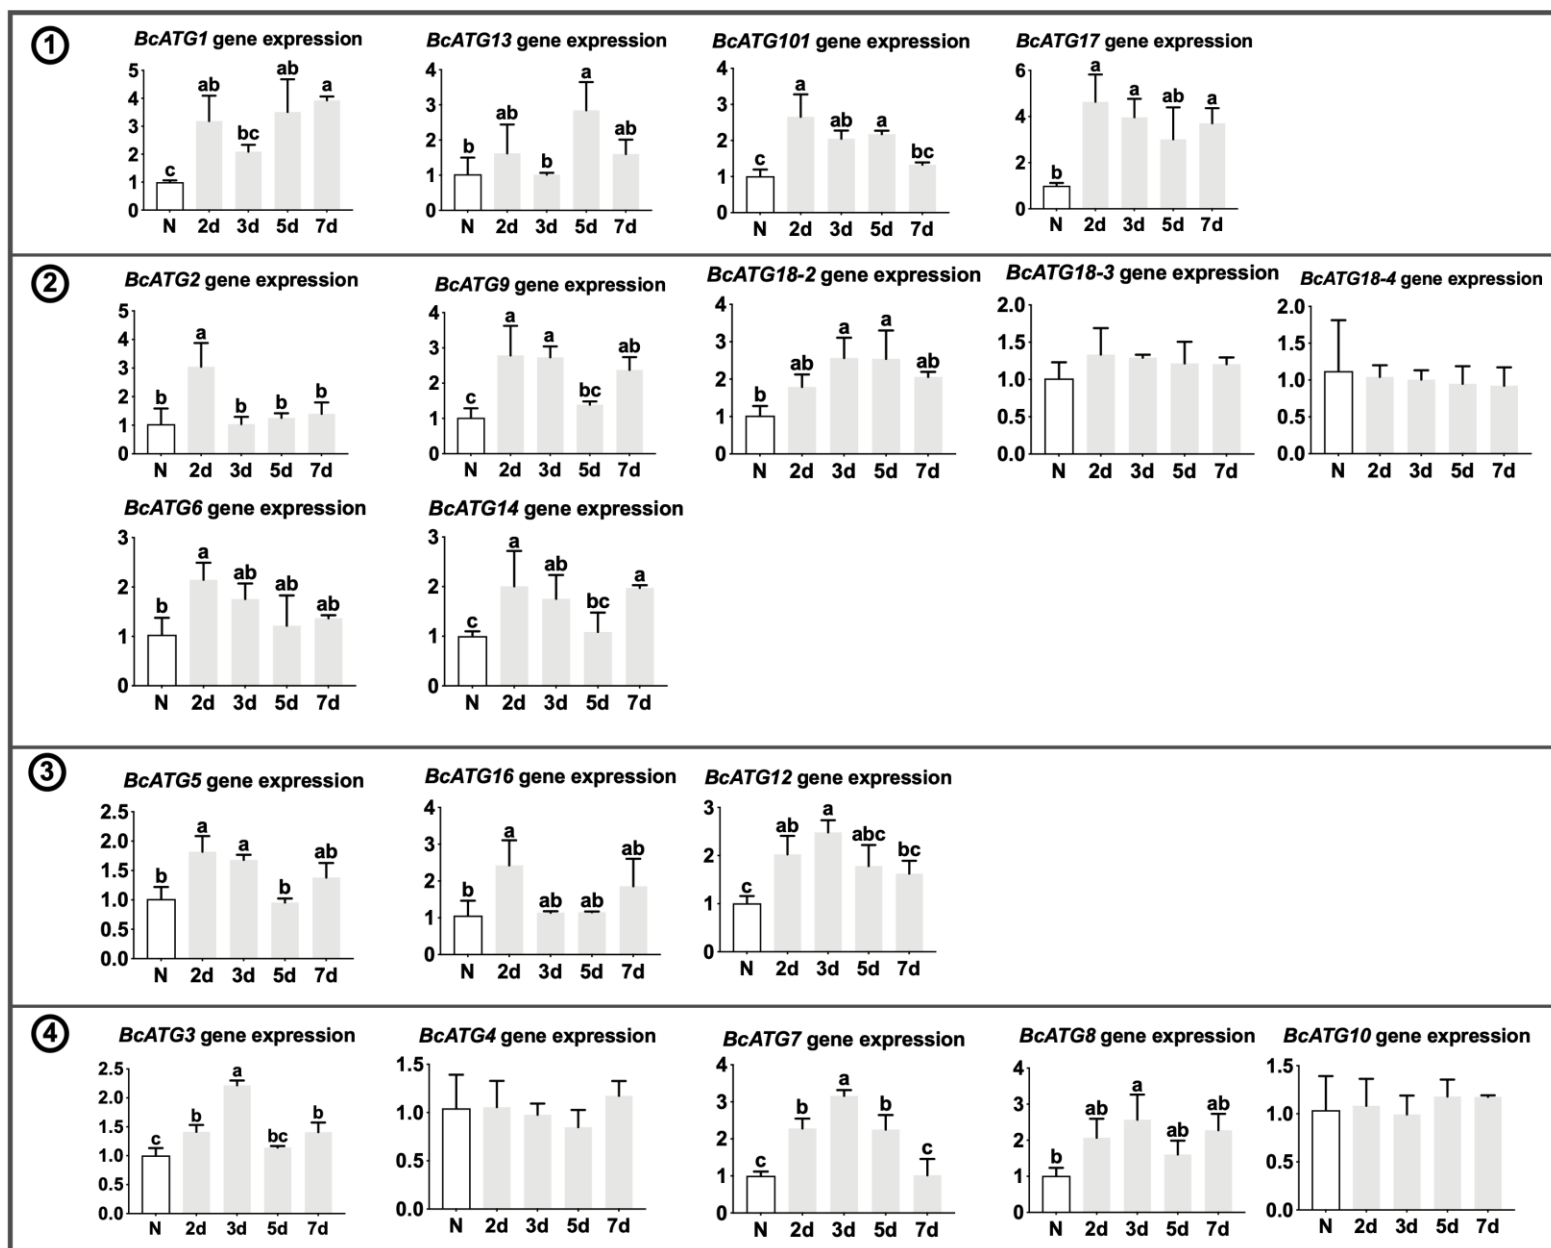

**Figure S1.** Regulation of ATGs in the psyllid gut upon LsoA infection. Data represent means  $\pm$  SD of three independent experiments. Different letters indicate statistical differences at  $P < 0.05$  using one-way ANOVA with Tukey's *post hoc* test. N: Lso-free colonies; A-2d, A-3d, A-5d, and A-7d indicate the psyllids were infected by LsoA for 2, 3, 5, and 7 days, respectively.

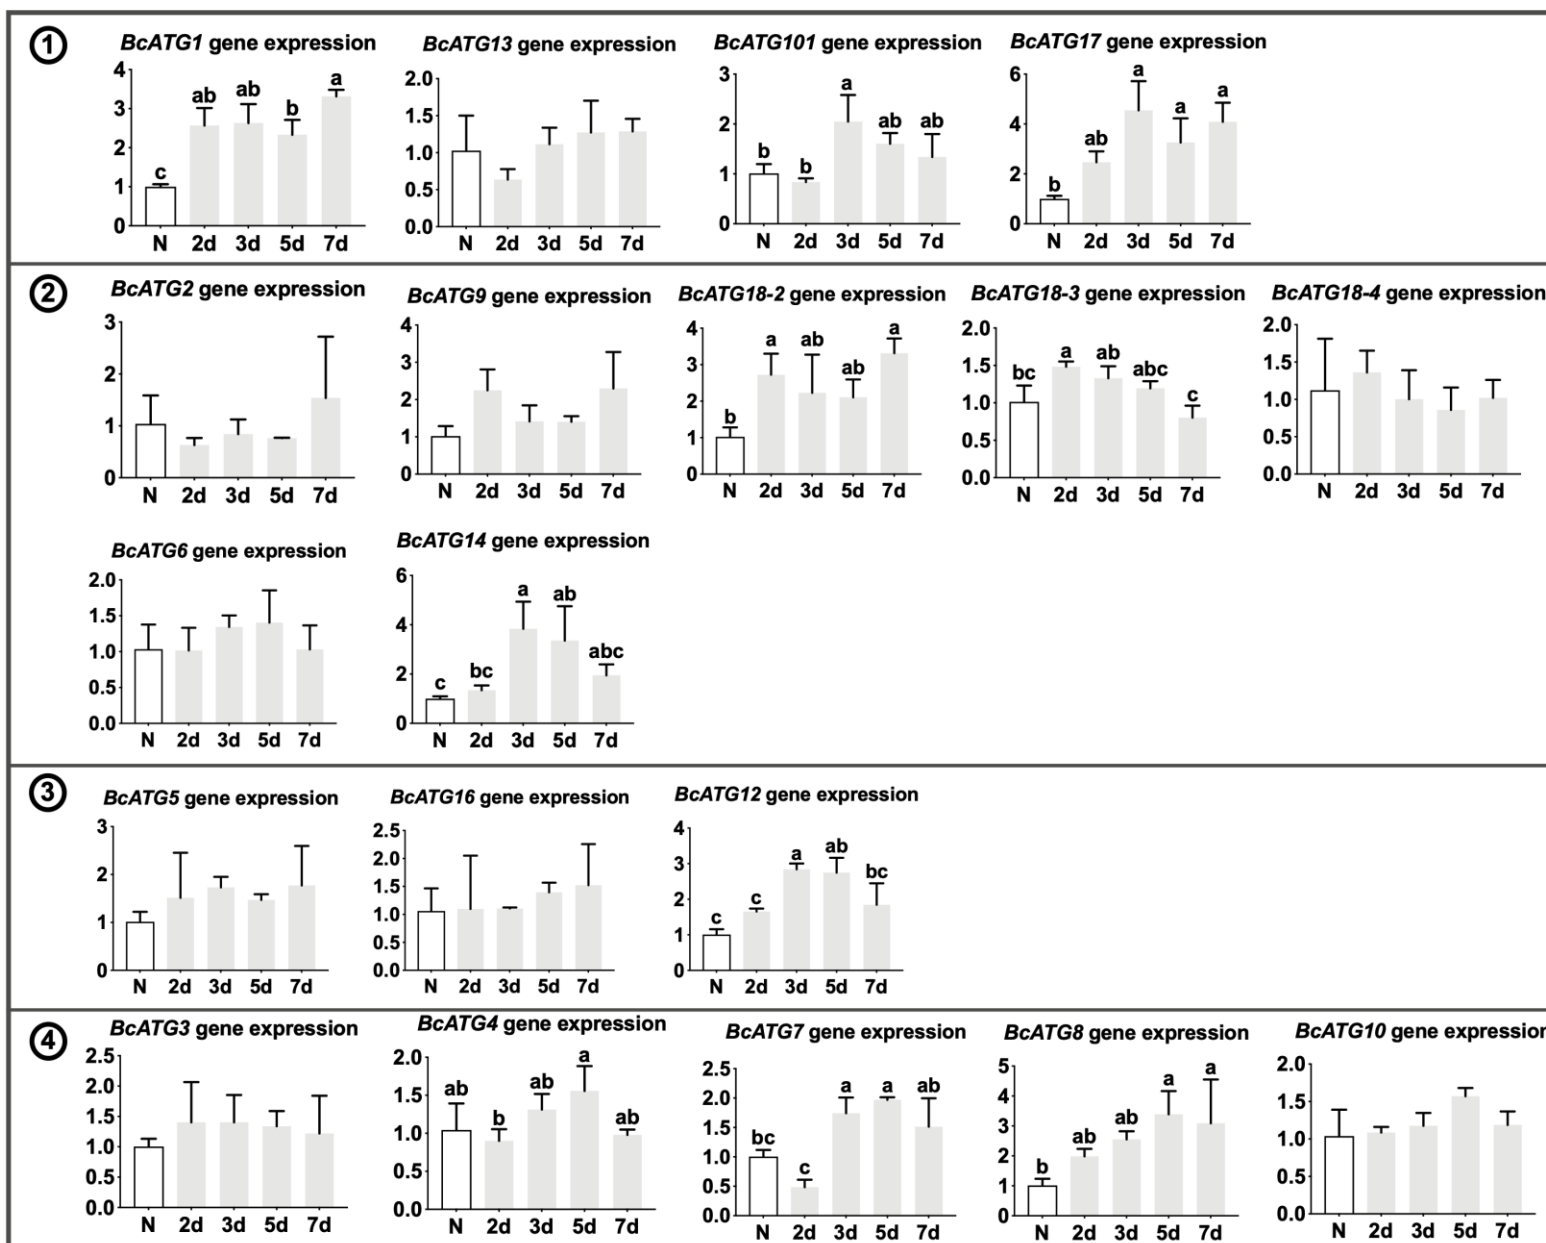

**Figure S2.** Regulation of ATGs in the psyllid gut upon LsoB infection. Data represent means  $\pm$  SD of three independent experiments. Different letters indicate statistical differences at  $P < 0.05$  using one-way ANOVA with Tukey's *post hoc* test. N: Lso-free colonies; B-2d, B-3d, B-5d, and B-7d indicate the psyllids were infected by LsoB for 2, 3, 5, and 7 days, respectively.

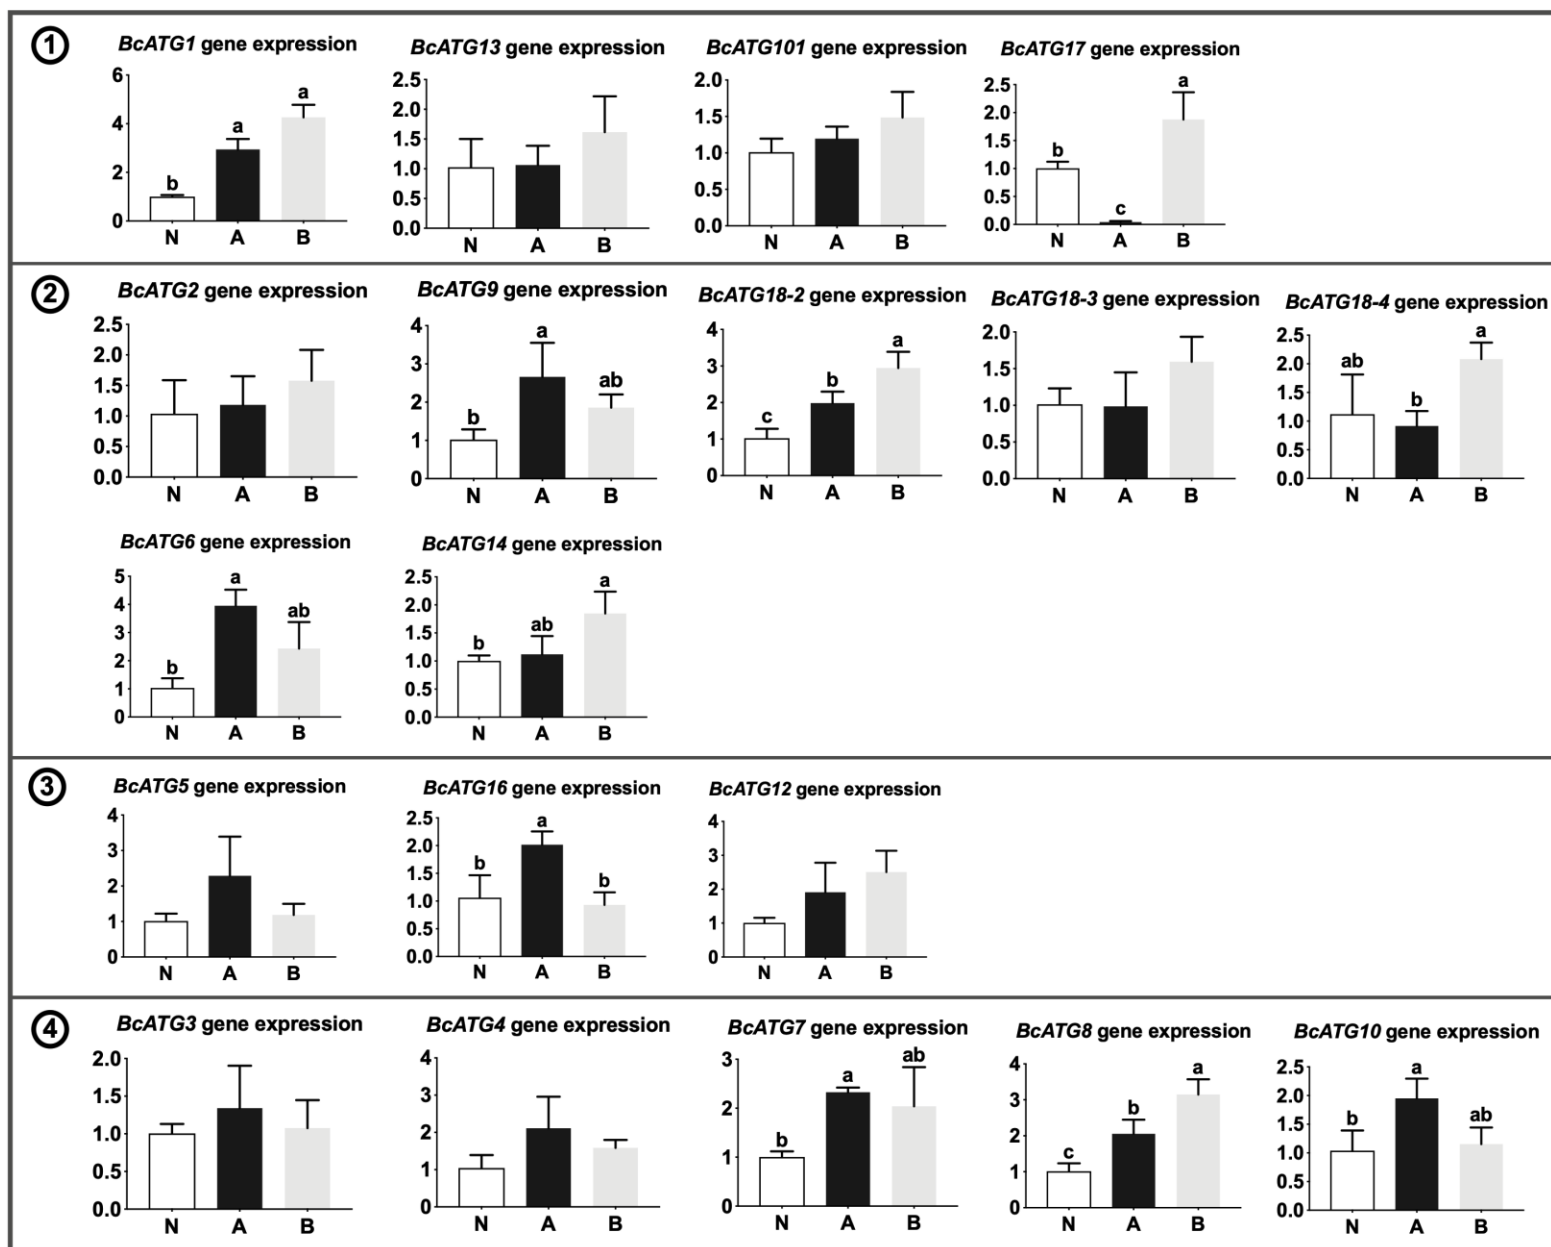

**Figure S3.** Regulation of ATGs in the psyllid gut in response to LsoA and LsoB persistent infection. Data represent means  $\pm$  SD of three independent experiments. Different letters indicate statistical differences at  $P < 0.05$  using one-way ANOVA with Tukey's *post hoc* test. N: Lso-free colonies; A and B indicate the psyllids were infected by LsoA and LsoB, respectively.
